# Supplementary material
Source: MDPI journal article supplement (https://www.mdpi.com/2071-1050/14/14/8497)
Supplement: s1 [file s1]

**Table S1.** Alphabetical list of the plant species recorded in the studied ecosystems.

| <b>a/a</b> | <b>Plant species</b>                 | <b>Family</b>           |
|------------|--------------------------------------|-------------------------|
| 1          | <i>Abies borisii regis</i>           | <i>Pinaceae</i>         |
| 2          | <i>Aethionema saxatile</i>           | <i>Brassicaceae</i>     |
| 3          | <i>Agrostis olivetorum</i>           | <i>Poaceae</i>          |
| 4          | <i>Aguja chamaepitys</i>             | <i>Lamiaceae</i>        |
| 5          | <i>Ajuga reptans</i>                 | <i>Lamiaceae</i>        |
| 6          | <i>Alkanna tinctoria</i>             | <i>Boraginaceae</i>     |
| 7          | <i>Alliaria petiolata</i>            | <i>Brassicaceae</i>     |
| 8          | <i>Allium aniculatum</i>             | <i>Alliaceae</i>        |
| 9          | <i>Allium famosum</i>                | <i>Alliaceae</i>        |
| 10         | <i>Allium flavum</i>                 | <i>Alliaceae</i>        |
| 11         | <i>Allium sphaerocephalon</i>        | <i>Alliaceae</i>        |
| 12         | <i>Alopecurus pratensis</i>          | <i>Poaceae</i>          |
| 13         | <i>Anchusa arvensis</i>              | <i>Boraginaceae</i>     |
| 14         | <i>Anemone blanda</i>                | <i>Ranunculaceae</i>    |
| 15         | <i>Anemone hortensis</i>             | <i>Ranunculaceae</i>    |
| 16         | <i>Anogramma leptophylla</i>         | <i>Pteridaceae</i>      |
| 17         | <i>Anthyllis hermanniae</i>          | <i>Asteraceae</i>       |
| 18         | <i>Arabidopsis thaliana</i>          | <i>Brassicaceae</i>     |
| 19         | <i>Aremonia agrimonoides</i>         | <i>Rosaceae</i>         |
| 20         | <i>Arenaria serpyllifolia</i>        | <i>Caryophyllaceae</i>  |
| 21         | <i>Aristolochia rotunda</i>          | <i>Aristolochiaceae</i> |
| 22         | <i>Artemisia vulgaris</i>            | <i>Asteraceae</i>       |
| 23         | <i>Asparagus acutifolius</i>         | <i>Asparagaceae</i>     |
| 24         | <i>Asparagus aphyllus orientalis</i> | <i>Asparagaceae</i>     |
| 25         | <i>Asplenium adiantum nigrum</i>     | <i>Aspleniaceae</i>     |
| 26         | <i>Asplenium cetarach</i>            | <i>Aspleniaceae</i>     |
| 27         | <i>Asplenium trichomanes</i>         | <i>Aspleniaceae</i>     |
| 28         | <i>Astragalus spruneri</i>           | <i>Fabaceae</i>         |
| 29         | <i>Athyrium filix femina</i>         | <i>Aspleniaceae</i>     |
| 30         | <i>Brachypodium distachyon</i>       | <i>Poaceae</i>          |
| 31         | <i>Brachypodium pinnatum</i>         | <i>Poaceae</i>          |
| 32         | <i>Brachypodium sylvaticum</i>       | <i>Poaceae</i>          |
| 33         | <i>Campanula persicifolia</i>        | <i>Campanulaceae</i>    |
| 34         | <i>Campanula trachelium</i>          | <i>Campanulaceae</i>    |
| 35         | <i>Cardamine bulbifera</i>           | <i>Brassicaceae</i>     |
| 36         | <i>Carduus acicularis</i>            | <i>Asteraceae</i>       |
| 37         | <i>Carduus nutans</i>                | <i>Asteraceae</i>       |
| 38         | <i>Carduus pycnocephalus</i>         | <i>Asteraceae</i>       |
| 39         | <i>Carex depauperata</i>             | <i>Poaceae</i>          |
| 40         | <i>Carex halleriana</i>              | <i>Poaceae</i>          |
| 41         | <i>Carex hirta</i>                   | <i>Poaceae</i>          |
| 42         | <i>Carex serrulata</i>               | <i>Poaceae</i>          |
| 43         | <i>Carpinus orientalis</i>           | <i>Betulaceae</i>       |
| 44         | <i>Castanea sativa</i>               | <i>Fagaceae</i>         |
| 45         | <i>Celtis australis</i>              | <i>Ulmaceae</i>         |
| 46         | <i>Centaurea cuneifolia</i>          | <i>Asteraceae</i>       |
| 47         | <i>Centaurea diffusa</i>             | <i>Asteraceae</i>       |
| 48         | <i>Centaurea graeca</i>              | <i>Asteraceae</i>       |
| 49         | <i>Centaurea napulifera</i>          | <i>Asteraceae</i>       |
| 50         | <i>Centaurea solstitialis</i>        | <i>Asteraceae</i>       |

|     |                                                     |                 |
|-----|-----------------------------------------------------|-----------------|
| 51  | <i>Cephalanthera damasonium</i>                     | Orchidaceae     |
| 52  | <i>Cerastium brachypetalum</i>                      | Caryophyllaceae |
| 53  | <i>Cercis siliquastrum</i>                          | Fabaceae        |
| 54  | <i>Chrysopogon gryllus</i>                          | Poaceae         |
| 55  | <i>Cirsium vulgare</i>                              | Asteraceae      |
| 56  | <i>Cistus salviifolius</i>                          | Cistaceae       |
| 57  | <i>Clematis vitalba</i>                             | Ranunculaceae   |
| 58  | <i>Clinopodium vulgare</i>                          | Lamiaceae       |
| 59  | <i>Clypeola jonthlaspi</i>                          | Brassicaceae    |
| 60  | <i>Coryllus avellana</i>                            | Betulaceae      |
| 61  | <i>Crepis reuteriana</i>                            | Asteraceae      |
| 62  | <i>Crepis sancta</i>                                | Asteraceae      |
| 63  | <i>Cupressus arizonica</i>                          | Cupressaceae    |
| 64  | <i>Cupressus sempervirens</i>                       | Cupressaceae    |
| 65  | <i>Cyclamen graecum</i>                             | Primulaceae     |
| 66  | <i>Cyclamen hederifolium</i>                        | Primulaceae     |
| 67  | <i>Dactylis glomerata</i>                           | Poaceae         |
| 68  | <i>Dactylorhiza saccifera</i>                       | Orchidaceae     |
| 69  | <i>Doronicum orientale</i>                          | Asteraceae      |
| 70  | <i>Dryopteris expansa</i>                           | Polypodiaceae   |
| 71  | <i>Ephedra</i> sp.                                  | Ephedraceae     |
| 72  | <i>Erica manipuliflora</i>                          | Ericaceae       |
| 73  | <i>Erodium cicutarium</i>                           | Geraniaceae     |
| 74  | <i>Eryngium campestre</i>                           | Asteraceae      |
| 75  | <i>Euphorbia apios</i>                              | Euphorbiaceae   |
| 76  | <i>Euphorbia helioscopia</i>                        | Euphorbiaceae   |
| 77  | <i>Fagus sylvatica</i>                              | Fagaceae        |
| 78  | <i>Festuca arundinacea</i>                          | Poaceae         |
| 79  | <i>Festuca heterophylla</i>                         | Poaceae         |
| 80  | <i>Filipendula vulgaris</i>                         | Rosaceae        |
| 81  | <i>Fragaria vesca</i>                               | Rosaceae        |
| 82  | <i>Fraxinus ornus</i>                               | Oleaceae        |
| 83  | <i>Fumana ericoides</i>                             | Lamiaceae       |
| 84  | <i>Fumana thymifolia</i>                            | Cistaceae       |
| 85  | <i>Galium aparine</i>                               | Rubiaceae       |
| 86  | <i>Galium pycnotrichum</i>                          | Rubiaceae       |
| 87  | <i>Galium verum</i> subsp. <i>verum</i>             | Rubiaceae       |
| 88  | <i>Genista carinalis</i>                            | Fabaceae        |
| 89  | <i>Gentiana cruciata</i>                            | Gentianaceae    |
| 90  | <i>Geranium lucidum</i>                             | Geraniaceae     |
| 91  | <i>Geum urbanum</i>                                 | Rosaceae        |
| 92  | <i>Globularia alypum</i>                            | Plantaginaceae  |
| 93  | <i>Hedera helix</i>                                 | Araliaceae      |
| 94  | <i>Helleborus cyclophyllus</i>                      | Ranunculaceae   |
| 95  | <i>Heracleum sphondylium</i> subsp. <i>ternatum</i> | Apiaceae        |
| 96  | <i>Hieracium bauhini</i>                            | Asteraceae      |
| 97  | <i>Hieracium murorum</i>                            | Asteraceae      |
| 98  | <i>Hieracium pilloselloides</i>                     | Asteraceae      |
| 99  | <i>Hieracium racemosum</i>                          | Asteraceae      |
| 100 | <i>Holcus lanatus</i>                               | Poaceae         |
| 101 | <i>Hypericum montbretti</i>                         | Hypericaceae    |
| 102 | <i>Hypericum olympicum</i>                          | Hypericaceae    |
| 103 | <i>Hypericum perforatum</i>                         | Hypericaceae    |
| 104 | <i>Hypericum triquetrifolium</i>                    | Hypericaceae    |
| 105 | <i>Hypochaeris glabra</i>                           | Asteraceae      |

|     |                                |                 |
|-----|--------------------------------|-----------------|
| 106 | <i>Hypochaeris radicata</i>    | Asteraceae      |
| 107 | <i>Ilex aquifolium</i>         | Aquifoliaceae   |
| 108 | <i>Inula salicina</i>          | Asteraceae      |
| 109 | <i>Jasione heldreichii</i>     | Campanulaceae   |
| 110 | <i>Jasminum fruticans</i>      | Oleaceae        |
| 111 | <i>Juniperus oxycedrus</i>     | Cupressaceae    |
| 112 | <i>Knautia ambigua</i>         | Dipsacaceae     |
| 113 | <i>Lamium maculatum</i>        | Lamiaceae       |
| 114 | <i>Lapsana communis</i>        | Asteraceae      |
| 115 | <i>Lathyrus laxiflorus</i>     | Fabaceae        |
| 116 | <i>Lathyrus venetus</i>        | Fabaceae        |
| 117 | <i>Leontodon cichoraceus</i>   | Asteraceae      |
| 118 | <i>Leontodon crispus</i>       | Asteraceae      |
| 119 | <i>Leontodon sp.</i>           | Asteraceae      |
| 120 | <i>Lilium martagon</i>         | Liliaceae       |
| 121 | <i>Limodorum abortivum</i>     | Orchidaceae     |
| 122 | <i>Lonicera etrusca</i>        | Caprifoliaceae  |
| 123 | <i>Lonicera implexa</i>        | Caprifoliaceae  |
| 124 | <i>Luzula forsteri</i>         | Juncaceae       |
| 125 | <i>Luzula multiflora</i>       | Juncaceae       |
| 126 | <i>Luzula sylvatica</i>        | Juncaceae       |
| 127 | <i>Malus sylvestris</i>        | Rosaceae        |
| 128 | <i>Medicago minima</i>         | Fabaceae        |
| 129 | <i>Melica uniflora</i>         | Poaceae         |
| 130 | <i>Mentha aquatica</i>         | Lamiaceae       |
| 131 | <i>Mentha pulegium</i>         | Lamiaceae       |
| 132 | <i>Moehringia trinervia</i>    | Caryophyllaceae |
| 133 | <i>Morina persica</i>          | Morinaceae      |
| 134 | <i>Muscari botryoides</i>      | Asparagaceae    |
| 135 | <i>Muscari comosum</i>         | Asparagaceae    |
| 136 | <i>Muscari neglectum</i>       | Asparagaceae    |
| 137 | <i>Mycelis muralis</i>         | Asteraceae      |
| 138 | <i>Myosotis ramossissima</i>   | Boraginaceae    |
| 139 | <i>Neottia nidus avis</i>      | Orchidaceae     |
| 140 | <i>Nepeta nuda albiflora</i>   | Lamiaceae       |
| 141 | <i>Oenanthe pimpinelloides</i> | Apiaceae        |
| 142 | <i>Oenanthe tenuifolia</i>     | Apiaceae        |
| 143 | <i>Orchis laxiflora</i>        | Orchidaceae     |
| 144 | <i>Orchis mascula</i>          | Orchidaceae     |
| 145 | <i>Orchis morio</i>            | Orchidaceae     |
| 146 | <i>Orchis palustris</i>        | Orchidaceae     |
| 147 | <i>Origanum vulgare</i>        | Lamiaceae       |
| 148 | <i>Osyris alba</i>             | Santalaceae     |
| 149 | <i>Phillyrea latifolia</i>     | Oleaceae        |
| 150 | <i>Pinus brutia</i>            | Pinaceae        |
| 151 | <i>Pinus nigra</i>             | Pinaceae        |
| 152 | <i>Pistacia lentiscus</i>      | Anacardiaceae   |
| 153 | <i>Pistacia terebinthus</i>    | Anacardiaceae   |
| 154 | <i>Plantago lanceolata</i>     | Plantaginaceae  |
| 155 | <i>Plantago major</i>          | Plantaginaceae  |
| 156 | <i>Platanthera bifolia</i>     | Orchidaceae     |
| 157 | <i>Poa bulbosa</i>             | Poaceae         |
| 158 | <i>Poa compressa</i>           | Poaceae         |
| 159 | <i>Poa nemoralis</i>           | Poaceae         |
| 160 | <i>Poa pratensis</i>           | Poaceae         |

|     |                                                      |                         |
|-----|------------------------------------------------------|-------------------------|
| 161 | <i>Poa trivialis</i>                                 | <i>Poaceae</i>          |
| 162 | <i>Polycnemon majus</i>                              | <i>Amaranthaceae</i>    |
| 163 | <i>Polygonatum odoratum</i>                          | <i>Asparagaceae</i>     |
| 164 | <i>Potentilla argentea</i>                           | <i>Rosaceae</i>         |
| 165 | <i>Potentilla micrantha</i>                          | <i>Rosaceae</i>         |
| 166 | <i>Primula veris</i>                                 | <i>Primulaceae</i>      |
| 167 | <i>Prunus avium</i>                                  | <i>Rosaceae</i>         |
| 168 | <i>Pteridium aquilinum</i>                           | <i>Dennstaedtiaceae</i> |
| 169 | <i>Pyrus amygdaliformis</i>                          | <i>Rosaceae</i>         |
| 170 | <i>Pyrus communis</i>                                | <i>Rosaceae</i>         |
| 171 | <i>Pyrus spinosa</i>                                 | <i>Rosaceae</i>         |
| 172 | <i>Quercus coccifera</i>                             | <i>Fagaceae</i>         |
| 173 | <i>Quercus frainetto</i>                             | <i>Fagaceae</i>         |
| 174 | <i>Quercus petraea</i>                               | <i>Fagaceae</i>         |
| 175 | <i>Quercus pubescens</i>                             | <i>Fagaceae</i>         |
| 176 | <i>Ranunculus millefoliatus</i>                      | <i>Ranunculaceae</i>    |
| 177 | <i>Ranunculus neapolitanus</i>                       | <i>Ranunculaceae</i>    |
| 178 | <i>Ranunculus psilostachys</i>                       | <i>Ranunculaceae</i>    |
| 179 | <i>Ranunculus repens</i>                             | <i>Ranunculaceae</i>    |
| 180 | <i>Reseda alba</i>                                   | <i>Resedaceae</i>       |
| 181 | <i>Rhamnus alaternus</i>                             | <i>Rhamnaceae</i>       |
| 182 | <i>Rosa agrestis</i>                                 | <i>Rosaceae</i>         |
| 183 | <i>Rosa arvensis</i>                                 | <i>Rosaceae</i>         |
| 184 | <i>Rosa canina</i>                                   | <i>Rosaceae</i>         |
| 185 | <i>Rubia peregrina</i>                               | <i>Rubiaceae</i>        |
| 186 | <i>Rubus canescens</i>                               | <i>Rosaceae</i>         |
| 187 | <i>Rubus hirtus</i>                                  | <i>Rosaceae</i>         |
| 188 | <i>Rumex acetosella</i> subsp. <i>acetoselloides</i> | <i>Polygonaceae</i>     |
| 189 | <i>Rumex pulcher</i> subsp. <i>pulcher</i>           | <i>Polygonaceae</i>     |
| 190 | <i>Rumex tuberosus</i>                               | <i>Polygonaceae</i>     |
| 191 | <i>Ruscus aculeatus</i>                              | <i>Asparagaceae</i>     |
| 192 | <i>Salvia sclarea</i>                                | <i>Lamiaceae</i>        |
| 193 | <i>Sanguisorba minor</i>                             | <i>Rosaceae</i>         |
| 194 | <i>Sanicula europaea</i>                             | <i>Apiaceae</i>         |
| 195 | <i>Satureja (clinopodium) suaveolens</i>             | <i>Lamiaceae</i>        |
| 196 | <i>Saxifraga bulbifera</i>                           | <i>Brassicaceae</i>     |
| 197 | <i>Saxifraga chrysospleniiifolia</i>                 | <i>Saxifragaceae</i>    |
| 198 | <i>Scolymus hispanicus</i>                           | <i>Asteraceae</i>       |
| 199 | <i>Sedum amplexicaule</i> subsp. <i>tenuifolium</i>  | <i>Crassulaceae</i>     |
| 200 | <i>Sedum rubens</i>                                  | <i>Crassulaceae</i>     |
| 201 | <i>Silene coronaria</i>                              | <i>Ranunculaceae</i>    |
| 202 | <i>Silene flavescent</i>                             | <i>Caryophyllaceae</i>  |
| 203 | <i>Silene italica</i>                                | <i>Caryophyllaceae</i>  |
| 204 | <i>Silene latifolia</i>                              | <i>Caryophyllaceae</i>  |
| 205 | <i>Silene vulgaris</i>                               | <i>Caryophyllaceae</i>  |
| 206 | <i>Sorbus aucuparia</i>                              | <i>Rosaceae</i>         |
| 207 | <i>Sorbus torminalis</i>                             | <i>Rosaceae</i>         |
| 208 | <i>Symphytum bulbosum</i>                            | <i>Boraginaceae</i>     |
| 209 | <i>Tanacetum corymbosum</i>                          | <i>Asteraceae</i>       |
| 210 | <i>Taraxacum officinale</i>                          | <i>Asteraceae</i>       |
| 211 | <i>Teucrium chamaedrys</i>                           | <i>Lamiaceae</i>        |
| 212 | <i>Teucrium flavum</i>                               | <i>Lamiaceae</i>        |
| 213 | <i>Teucrium polium</i> subsp. <i>capitatum</i>       | <i>Lamiaceae</i>        |
| 214 | <i>Thalictrum aquilegifolium</i>                     | <i>Ranunculaceae</i>    |
| 215 | <i>Thymus comptus</i>                                | <i>Lamiaceae</i>        |

|     |                                                           |                         |
|-----|-----------------------------------------------------------|-------------------------|
| 216 | <i>Thymus longicaulis</i> subsp. <i>chaubardii</i>        | <i>Lamiaceae</i>        |
| 217 | <i>Thymus sibthorpii</i>                                  | <i>Lamiaceae</i>        |
| 218 | <i>Thymus vulgaris</i>                                    | <i>Lamiaceae</i>        |
| 219 | <i>Trifolium alpestre</i>                                 | <i>Fabaceae</i>         |
| 220 | <i>Trifolium campestre</i>                                | <i>Fabaceae</i>         |
| 221 | <i>Trifolium fragiferum</i>                               | <i>Fabaceae</i>         |
| 222 | <i>Trifolium pignanii</i>                                 | <i>Fabaceae</i>         |
| 223 | <i>Trifolium pratense</i>                                 | <i>Fabaceae</i>         |
| 224 | <i>Trifolium pseudomedium</i>                             | <i>Fabaceae</i>         |
| 225 | <i>Trifolium repens</i>                                   | <i>Fabaceae</i>         |
| 226 | <i>Trifolium stellatum</i>                                | <i>Fabaceae</i>         |
| 227 | <i>Umbilicus rupestris</i>                                | <i>Crassulaceae</i>     |
| 228 | <i>Verbascum densiflorum</i>                              | <i>Scrophulariaceae</i> |
| 229 | <i>Verbascum nigrum</i>                                   | <i>Scrophulariaceae</i> |
| 230 | <i>Verbascum phlomoides</i>                               | <i>Scrophulariaceae</i> |
| 231 | <i>Verbascum sinuatum</i>                                 | <i>Scrophulariaceae</i> |
| 232 | <i>Verbascum undulatum</i>                                | <i>Scrophulariaceae</i> |
| 233 | <i>Veronica chamaedrys</i>                                | <i>Plantaginaceae</i>   |
| 234 | <i>Veronica serpyllifolia</i> subsp. <i>serpyllifolia</i> | <i>Plantaginaceae</i>   |
| 235 | <i>Vicia villosa</i>                                      | <i>Fabaceae</i>         |
| 236 | <i>Vincetoxicum hirundinaria</i>                          | <i>Apocynaceae</i>      |
| 237 | <i>Viola alba</i>                                         | <i>Violaceae</i>        |
| 238 | <i>Viola kitaibeliana</i>                                 | <i>Violaceae</i>        |
| 239 | <i>Viola reichenbachiana</i>                              | <i>Violaceae</i>        |
| 240 | <i>Viola riviniana</i>                                    | <i>Violaceae</i>        |
| 241 | <i>Viola tricolor</i>                                     | <i>Violaceae</i>        |
